# Supplementary material for: Brassinin Promotes the Degradation of Tie2 and FGFR1 in Endothelial Cells and Inhibits Triple-Negative Breast Cancer Angiogenesis
Source: MDPI journal article supplement (doi:10.3390/cancers14143540), 2022-07-21

Figure S1

original images of WB for Fig. 5a

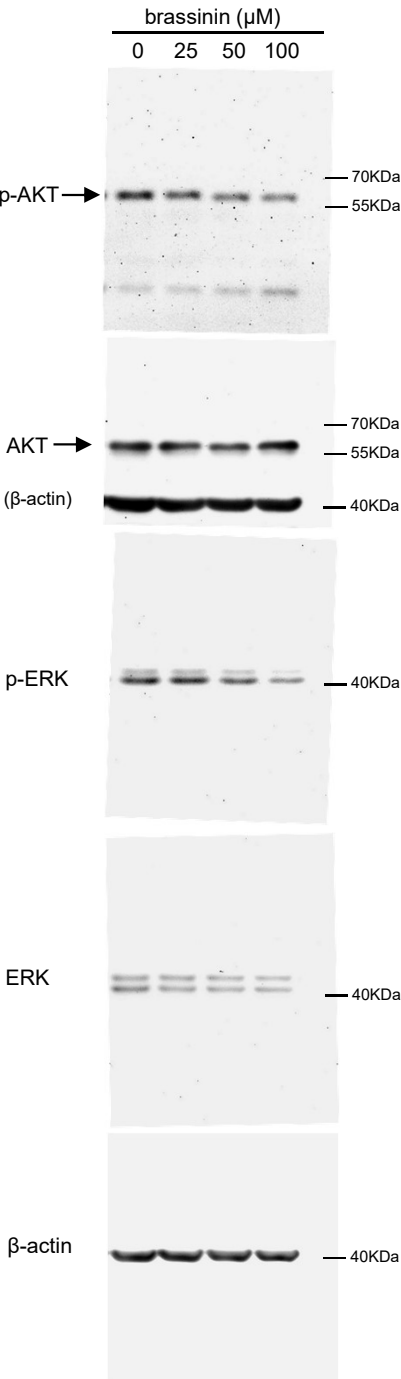

original images of WB for Fig. 5d

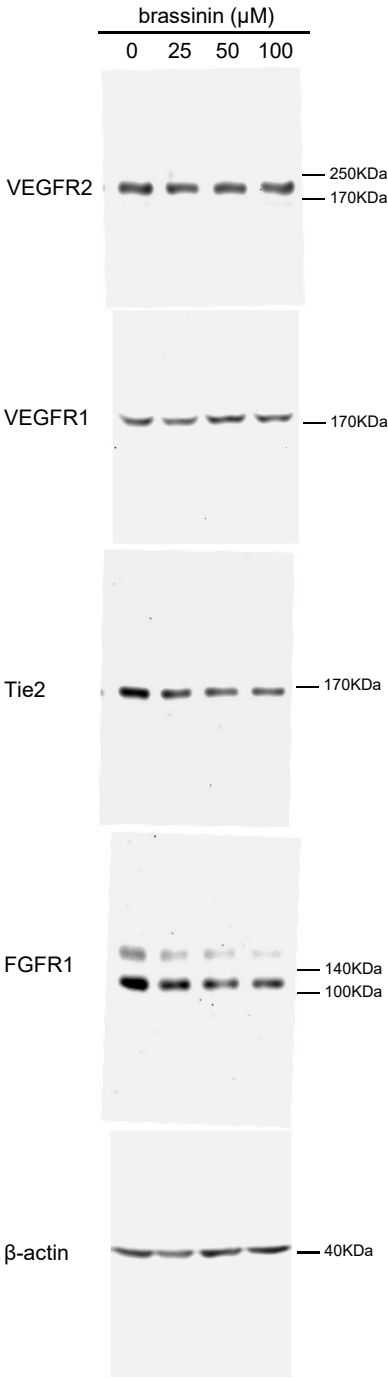

original images of WB for Fig. 5i

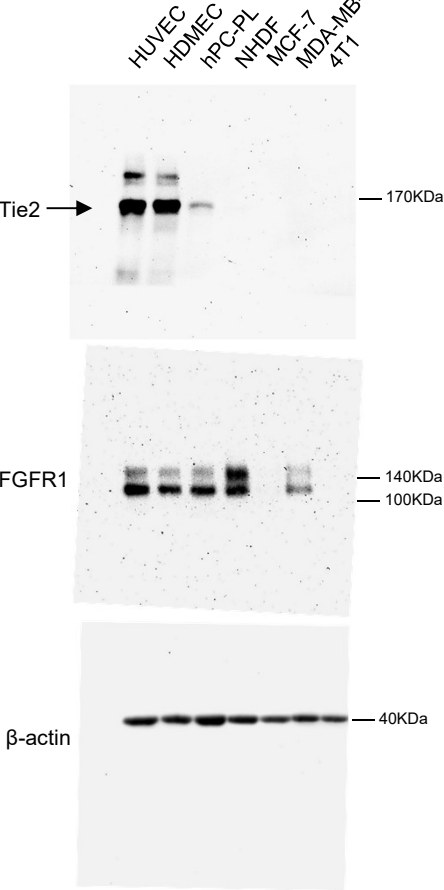

original images of WB for Fig. 6a

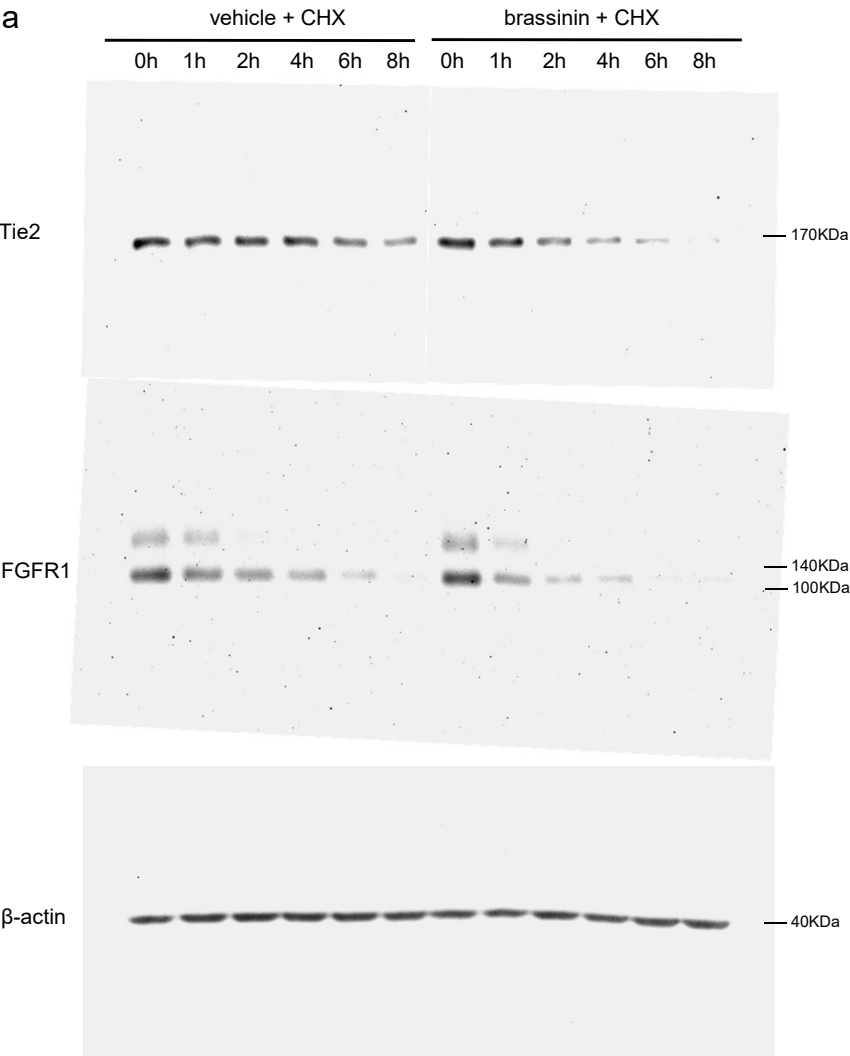

original images of WB for Fig. 6f

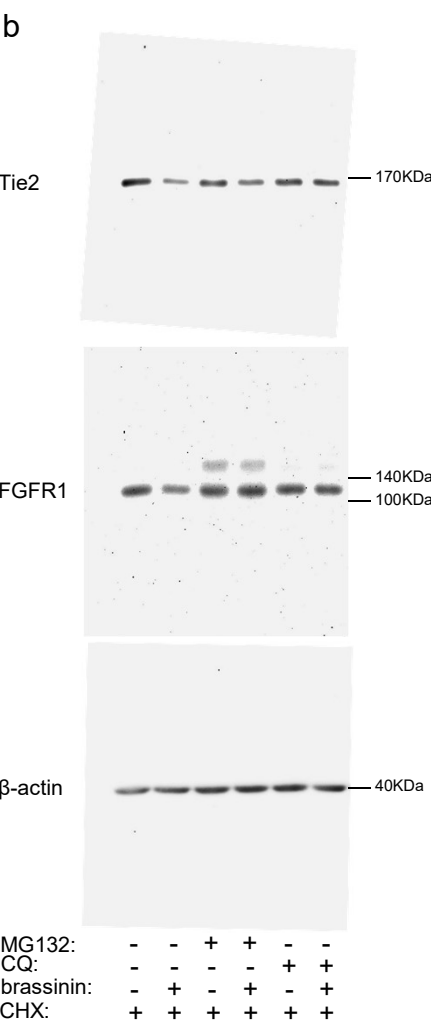

original images of WB for Fig. S1

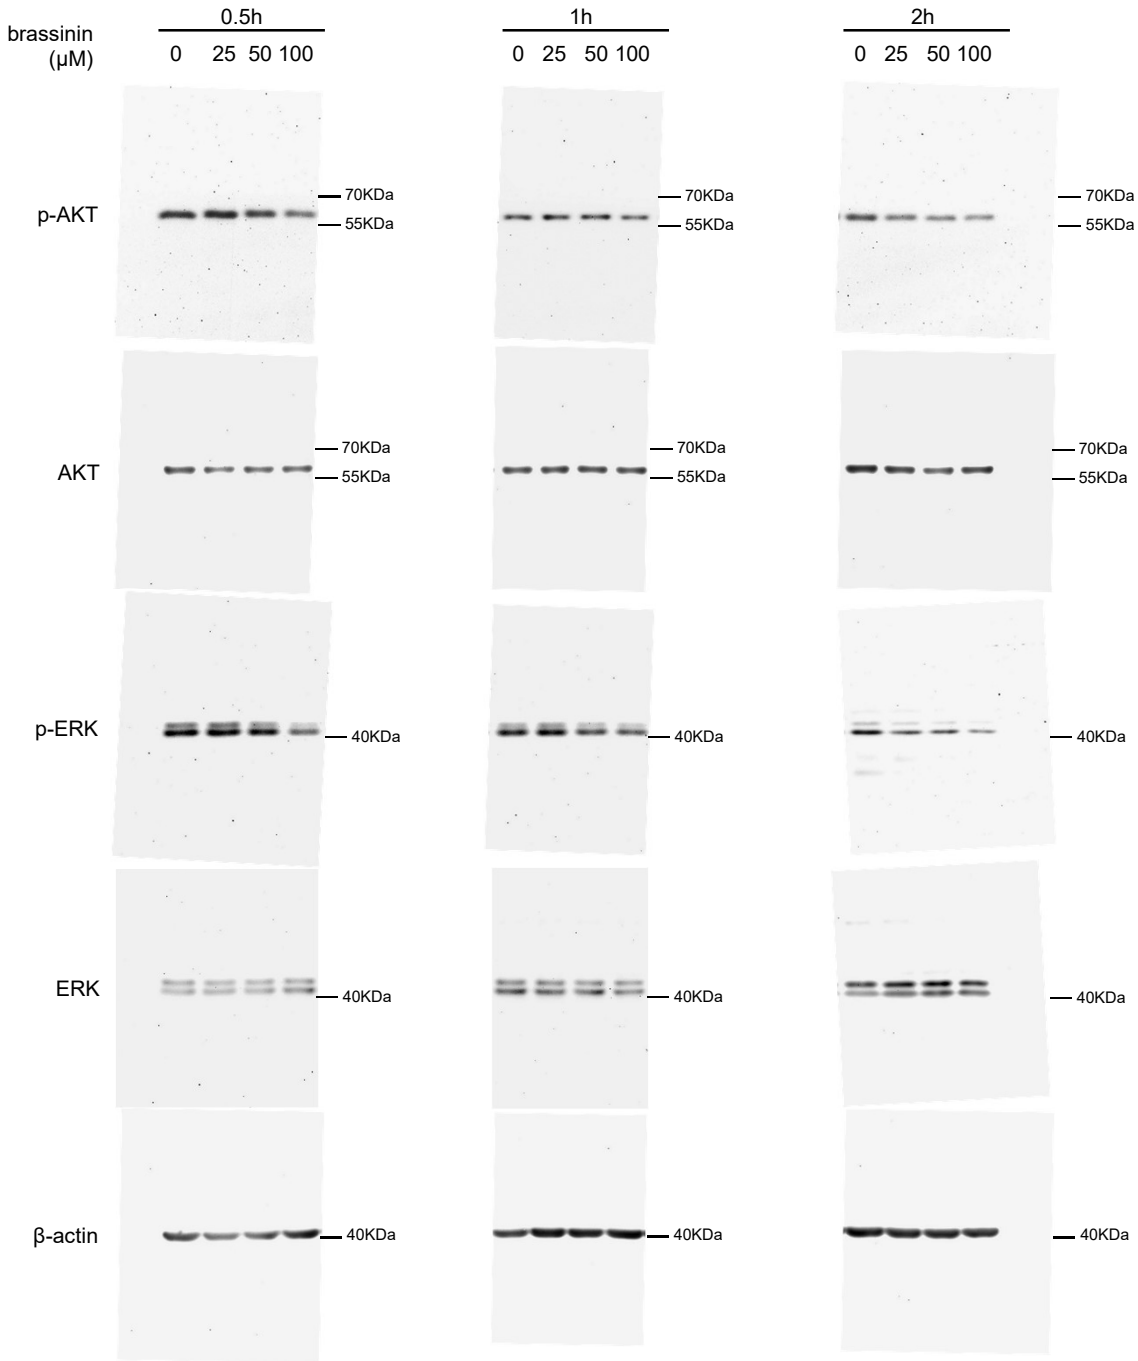

Supplement: s1 [file s1]
