# Supplementary material for: Brassinin Promotes the Degradation of Tie2 and FGFR1 in Endothelial Cells and Inhibits Triple-Negative Breast Cancer Angiogenesis
Source: MDPI journal article supplement (doi:10.3390/cancers14143540), 2022-07-21
Supplement: s1 [file s1]

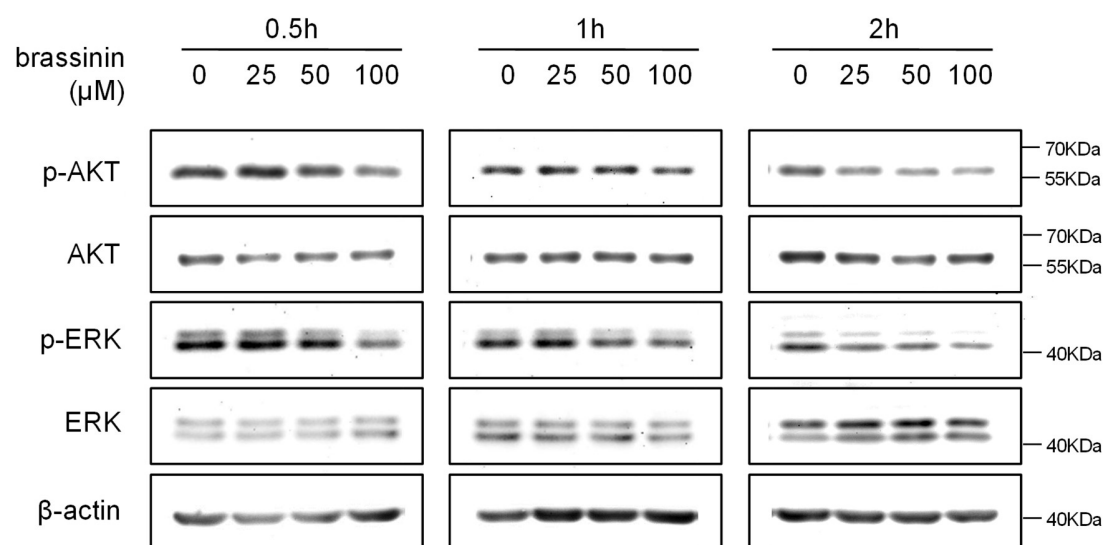

**Figure S2.** Brassinin inhibits AKT and ERK phosphorylation in ECs after short exposure. Western blots of p-AKT, AKT, p-ERK, ERK and  $\beta$ -actin expressed in HUVECs that were treated for 0.5, 1 and 2 h with 0, 25, 50 and 100  $\mu$ M brassinin.
